# Supplementary material for: The Rapid Discrimination and Quality Assessment of Three Zanthoxylum Species Using 1H NMR Spectrometry
Source: Hindawi journal article supplement (doi:10.1155/2020/3830258), 2020-08-07

**Table S1 : The herbarium record of *Zanthoxylum* species**

| <b>Herbarium Record</b> | <b>Species</b>      | <b>Origin</b> | <b>Herbarium Record</b> | <b>Species</b>      | <b>Origin</b> | <b>Herbarium Record</b> | <b>Species</b>         | <b>Origin</b> |
|-------------------------|---------------------|---------------|-------------------------|---------------------|---------------|-------------------------|------------------------|---------------|
| KNUPH-ZP-1              | <i>Z. piperitum</i> | Korea         | KNUPH-ZB-1              | <i>Z. bungeanum</i> | China         | KNUPH-ZS-1              | <i>Z. schinifolium</i> | Korea         |
| KNUPH-ZP-2              | <i>Z. piperitum</i> | Korea         | KNUPH-ZB-2              | <i>Z. bungeanum</i> | China         | KNUPH-ZS-2              | <i>Z. schinifolium</i> | Korea         |
| KNUPH-ZP-3              | <i>Z. piperitum</i> | Korea         | KNUPH-ZB-3              | <i>Z. bungeanum</i> | China         | KNUPH-ZS-3              | <i>Z. schinifolium</i> | Korea         |
| KNUPH-ZP-4              | <i>Z. piperitum</i> | Korea         | KNUPH-ZB-4              | <i>Z. bungeanum</i> | China         | KNUPH-ZS-4              | <i>Z. schinifolium</i> | Korea         |
| KNUPH-ZP-5              | <i>Z. piperitum</i> | Korea         | KNUPH-ZB-5              | <i>Z. bungeanum</i> | China         | KNUPH-ZS-5              | <i>Z. schinifolium</i> | Korea         |
| KNUPH-ZP-6              | <i>Z. piperitum</i> | Korea         | KNUPH-ZB-6              | <i>Z. bungeanum</i> | China         | KNUPH-ZS-6              | <i>Z. schinifolium</i> | Korea         |
| KNUPH-ZP-7              | <i>Z. piperitum</i> | Korea         | KNUPH-ZB-7              | <i>Z. bungeanum</i> | China         |                         |                        |               |
| KNUPH-ZP-8              | <i>Z. piperitum</i> | Korea         | KNUPH-ZB-8              | <i>Z. bungeanum</i> | China         |                         |                        |               |
| KNUPH-ZP-9              | <i>Z. piperitum</i> | Korea         | KNUPH-ZB-9              | <i>Z. bungeanum</i> | China         |                         |                        |               |
| KNUPH-ZP-10             | <i>Z. piperitum</i> | Korea         | KNUPH-ZB-10             | <i>Z. bungeanum</i> | China         |                         |                        |               |
| KNUPH-ZP-11             | <i>Z. piperitum</i> | Korea         | KNUPH-ZB-11             | <i>Z. bungeanum</i> | China         |                         |                        |               |
| KNUPH-ZP-12             | <i>Z. piperitum</i> | Korea         | KNUPH-ZB-12             | <i>Z. bungeanum</i> | China         |                         |                        |               |
| KNUPH-ZP-13             | <i>Z. piperitum</i> | Korea         | KNUPH-ZB-13             | <i>Z. bungeanum</i> | China         |                         |                        |               |
| KNUPH-ZP-14             | <i>Z. piperitum</i> | Korea         |                         |                     |               |                         |                        |               |
| KNUPH-ZP-15             | <i>Z. piperitum</i> | Korea         |                         |                     |               |                         |                        |               |
| KNUPH-ZP-16             | <i>Z. piperitum</i> | Korea         |                         |                     |               |                         |                        |               |

**Figure S1: The  $^1\text{H}$  NMR spectrum of xanthoxylin.**

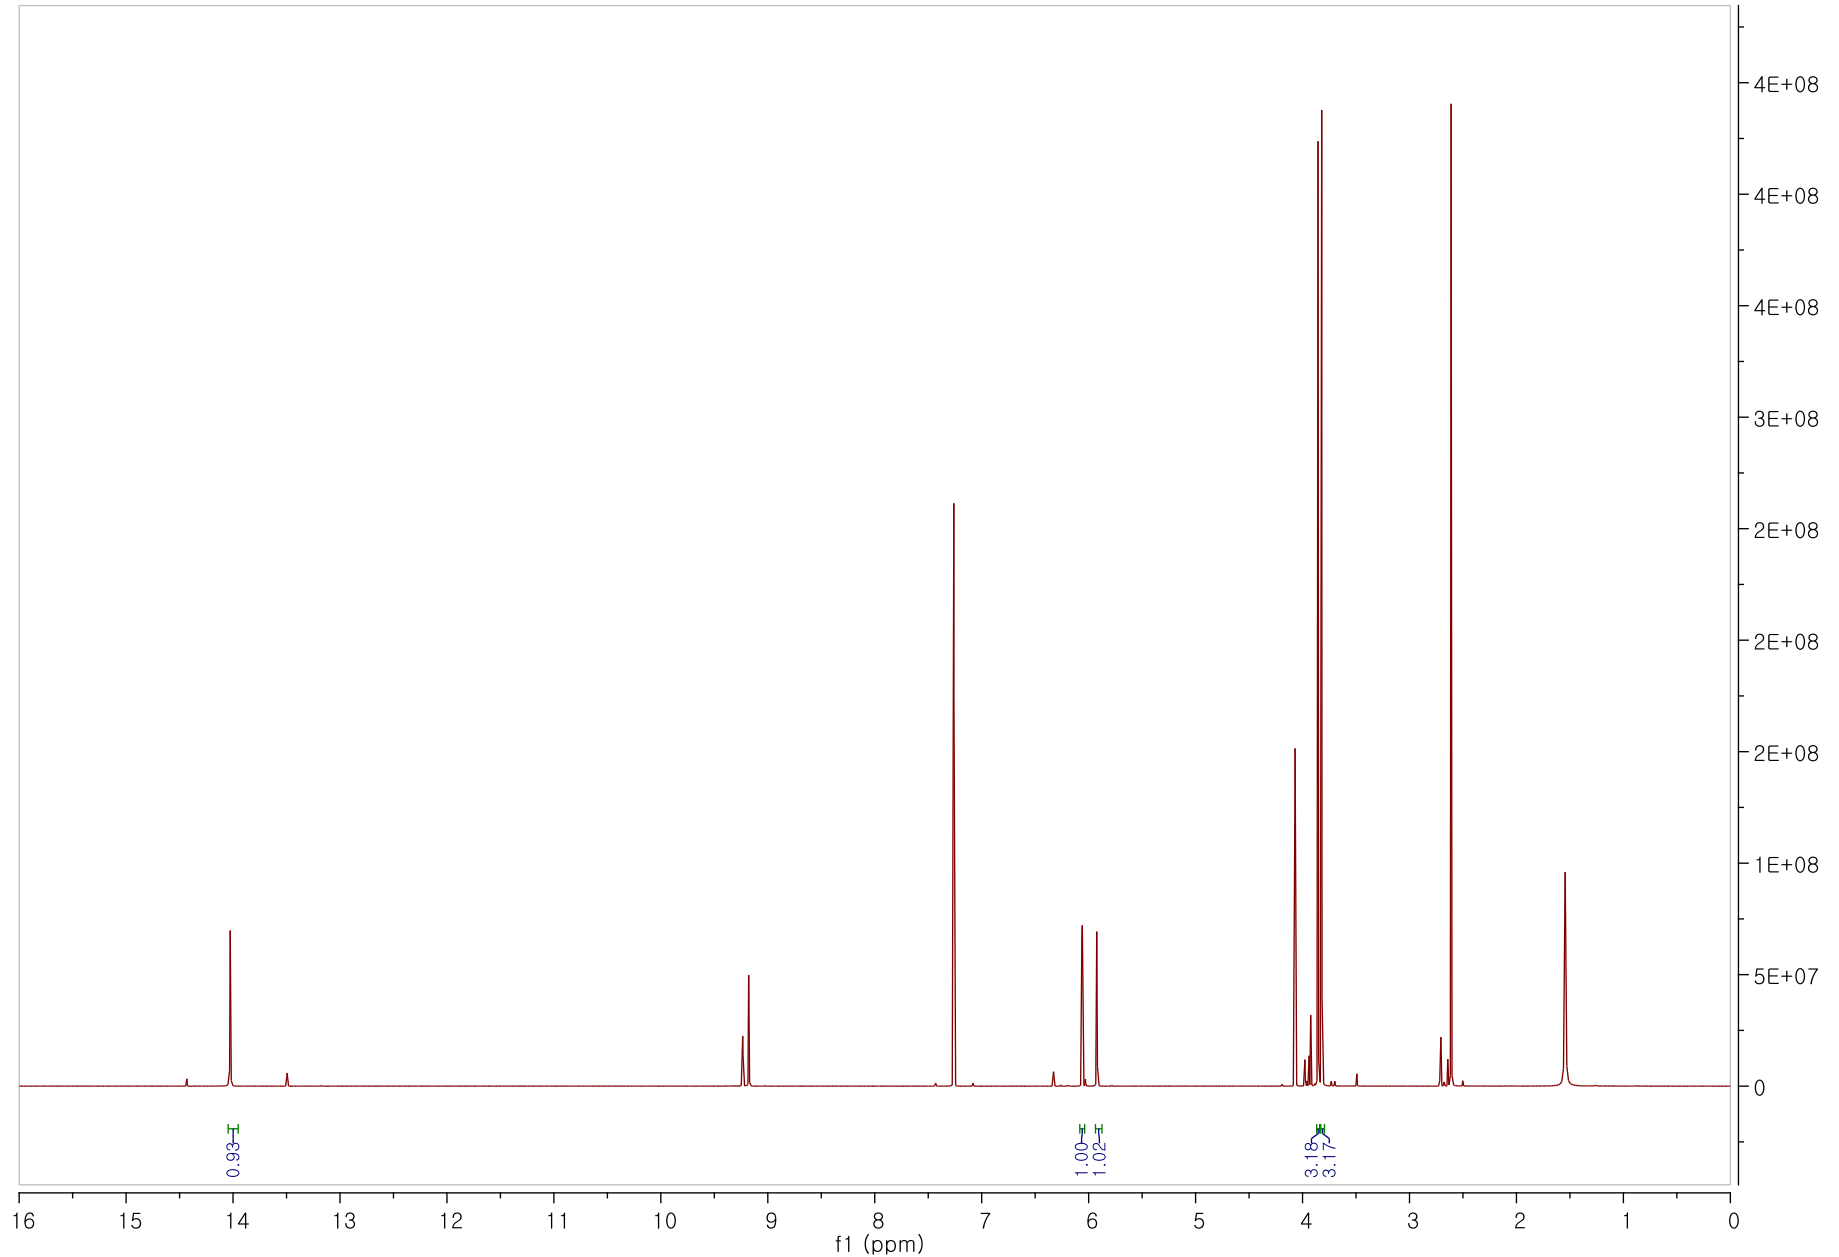

Supplement: f1 [file 3830258.f1.pdf]
